# Supplementary material
Source: Springer Nature journal article supplement (https://www.springermedizin.de/resource/supplementary/12875_2010_488_MOESM2_ESM.pdf/9434716)

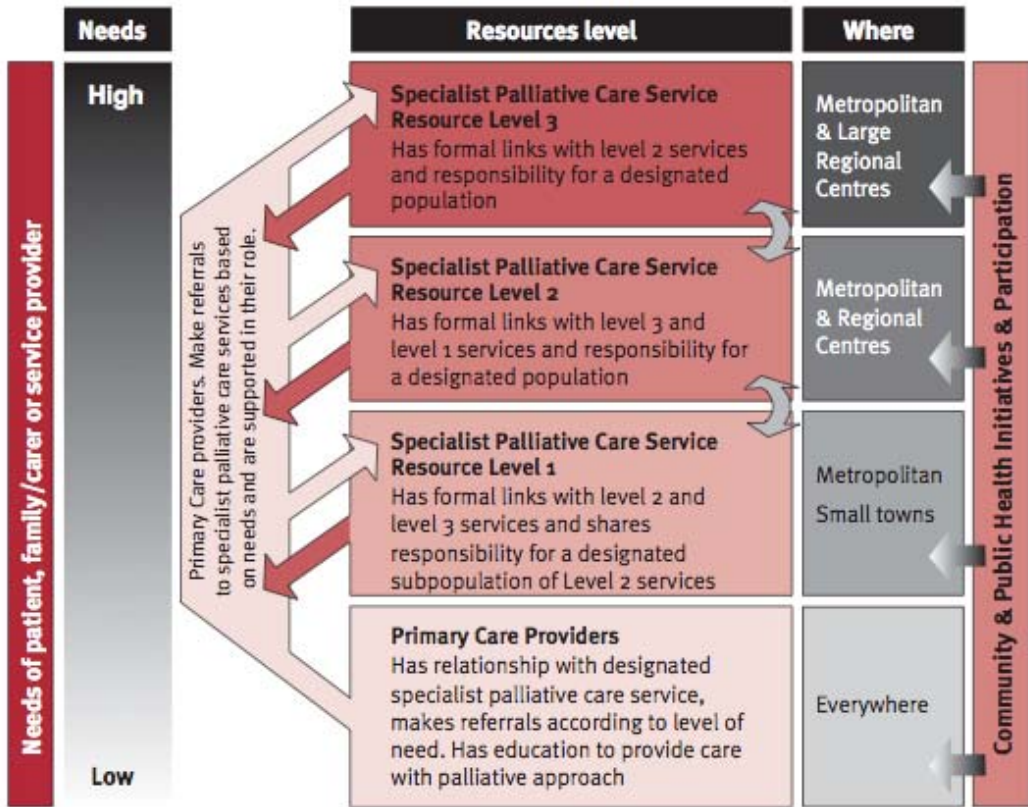

Key:  = Referral     = Support     = Participation     = Interaction

Supplement: MOESM2 [file 9434716]
